# Supplementary material for: Sedentariness of College Students Is Negatively Associated with Perceived Neighborhood Greenness at Home, but Not at University
Source: MDPI journal article supplement (doi:10.3390/ijerph17010235), 2019-12-28
Supplement: s1 [file s1]

## Supplementary Materials

## Sedentariness is negatively associated with Perceived Neighborhood Greenness at Home, but not at University

Alexander Karl Ferdinand Loder <sup>1\*</sup>, and Mireille Nicoline Maria van Poppel <sup>2</sup>

<sup>1</sup> Institute of Sport Science, University of Graz & Staff Department Quality Management, University of Music and Performing Arts Graz, Graz, Austria; alexlode@live.at

<sup>2</sup> Institute of Sport Science, University of Graz, Graz, Austria; mireille.van-poppel@uni-graz.at

\* Correspondence: alexlode@live.at

**Supplementary Table S1.** Correlation matrix of possible confounders in the combined datasets after multiple imputation of all variables.

|                                   | BMI                      | Physical Activity        | Time spent sitting       | PG home                  | PG university            | Gender                   | Age                     | Income                  | Education |
|-----------------------------------|--------------------------|--------------------------|--------------------------|--------------------------|--------------------------|--------------------------|-------------------------|-------------------------|-----------|
| BMI                               |                          |                          |                          |                          |                          |                          |                         |                         |           |
| Physical Activity                 | $r = -.02$<br>$p = .351$ |                          |                          |                          |                          |                          |                         |                         |           |
| Time spent sitting                | $r = .02$<br>$p = .388$  | $r = -.20$<br>$p < .001$ |                          |                          |                          |                          |                         |                         |           |
| Perceived Greenness at home       | $r = -.04$<br>$p = .269$ | $r = .004$<br>$p = .471$ | $r = -.09$<br>$p = .059$ |                          |                          |                          |                         |                         |           |
| Perceived Greenness at university | $r = .02$<br>$p = .364$  | $r = .01$<br>$p = .416$  | $r = -.08$<br>$p = .082$ | $r = .27$<br>$p < .001$  |                          |                          |                         |                         |           |
| Gender                            | $r = .11$<br>$p = .026$  | $r = -.05$<br>$p = .184$ | $r = .06$<br>$p = .167$  | $r = -.02$<br>$p = .398$ | $r = .01$<br>$p = .455$  |                          |                         |                         |           |
| Age                               | $r = .27$<br>$p < .001$  | $r = -.04$<br>$p = .226$ | $r = .08$<br>$p = .093$  | $r = .07$<br>$p = .133$  | $r = -.03$<br>$p = .318$ | $r = .12$<br>$p = .024$  |                         |                         |           |
| Income                            | $r = .15$<br>$p = .006$  | $r = .02$<br>$p = .392$  | $r = -.01$<br>$p = .452$ | $r = .05$<br>$p = .175$  | $r = -.03$<br>$p = .280$ | $r = .04$<br>$p = .227$  | $r = .52$<br>$p < .001$ |                         |           |
| Education                         | $r = .05$<br>$p = .190$  | $r = -.13$<br>$p = .011$ | $r = .05$<br>$p = .176$  | $r = .04$<br>$p = .247$  | $r = -.07$<br>$p = .119$ | $r = -.08$<br>$p = .086$ | $r = .36$<br>$p < .001$ | $r = .22$<br>$p < .001$ |           |

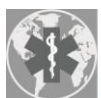

1 **Supplementary Table S2.** Collinearity statistic of the original dataset in multivariate regression  
2 analysis for confounder testing.  
3

| Variable                          | Tolerance | Variance Inflation Factor |
|-----------------------------------|-----------|---------------------------|
| <i>BMI</i>                        |           |                           |
| Perceived Greenness at Home       | .92       | 1.10                      |
| Perceived Greenness at University | .92       | 1.09                      |
| Gender                            | .97       | 1.04                      |
| Age                               | .64       | 1.58                      |
| Income                            | .72       | 1.39                      |
| Education                         | .84       | 1.19                      |
| <i>Physical Activity</i>          |           |                           |
| Perceived Greenness at Home       | .92       | 1.09                      |
| Perceived Greenness at University | .92       | 1.08                      |
| Gender                            | .97       | 1.04                      |
| Age                               | .65       | 1.53                      |
| Income                            | .73       | 1.37                      |
| Education                         | .85       | 1.18                      |
| <i>Sedentariness</i>              |           |                           |
| Perceived Greenness at Home       | .91       | 1.10                      |
| Perceived Greenness at University | .92       | 1.09                      |
| Gender                            | .97       | 1.03                      |
| Age                               | .63       | 1.59                      |
| Income                            | .71       | 1.41                      |
| Education                         | .84       | 1.18                      |

4  
5

6 **Supplementary Table S3.** Linear regression models with BMI as outcome and perceived greenness  
 7 as well as possible confounders as indicators (extended from Table 2).  
 8

| Analyses                  | $R^2$  | $F$   | $df$   | $b$    | $t$   | $df$ | 95% CI $b$      | $p$    |
|---------------------------|--------|-------|--------|--------|-------|------|-----------------|--------|
| Univariate                |        |       |        |        |       |      |                 |        |
| At home                   | < .001 | 0.002 | 1, 471 | 0.01   | 0.42  | 467  | -0.02 –<br>0.02 | .966   |
| At university             | .001   | 0.57  | 1, 467 | 0.01   | 0.75  | 467  | -0.01 –<br>0.02 | .449   |
| Overall                   | .001   | 0.30  | 1, 471 | 0.01   | 0.56  | 471  | -0.02 –<br>0.03 | .579   |
| Multivariate              |        |       |        |        |       |      |                 |        |
| At home and at university | .001   | 0.29  | 2, 466 |        |       |      |                 | .746   |
| At home                   |        |       |        | -0.001 | -0.12 | 466  | -0.02 –<br>0.02 | .906   |
| At university             |        |       |        | 0.01   | 0.76  | 466  | -0.01 –<br>0.02 | .446   |
| Multivariate adjusted     |        |       |        |        |       |      |                 |        |
| With confounders          |        |       |        |        |       |      |                 |        |
| At home                   |        |       |        | -.01   | -0.65 | 593  | -0.03 –<br>0.01 | .518   |
| At university             |        |       |        | .01    | 0.91  | 593  | 0.01 –<br>0.03  | .361   |
| Gender                    |        |       |        | .65    | 1.77  | 593  | -0.07 –<br>1.38 | .077   |
| Age                       |        |       |        | .15    | 5.27  | 593  | 0.10 –<br>0.21  | < .001 |
| Income                    |        |       |        | -.19   | -0.44 | 593  | -1.06 –<br>0.67 | .660   |
| Education                 |        |       |        | -.10   | -0.58 | 593  | -0.44 –<br>0.24 | .563   |

9  
 10  
 11

12 **Supplementary Table S4.** Linear regression models with physical activity and physical  
 13 sedentariness as outcomes and perceived greenness measures as indicators (extended from Table 2).  
 14

| <i>Physical Activity (Met-h per week)</i> |                      |          |           |          |          |           |                    |          |
|-------------------------------------------|----------------------|----------|-----------|----------|----------|-----------|--------------------|----------|
| <b>Analyses</b>                           | <b>R<sup>2</sup></b> | <b>F</b> | <b>df</b> | <b>b</b> | <b>t</b> | <b>df</b> | <b>95% CI b</b>    | <b>p</b> |
| Univariate                                |                      |          |           |          |          |           |                    |          |
| At home                                   | .002                 | 0.90     | 1, 419    | 0.14     | 0.95     | 419       | -0.15 –<br>0.44    | .344     |
| At university                             | < .001               | 0.01     | 1, 415    | 0.01     | 0.10     | 415       | -0.23 –<br>0.26    | .919     |
| Overall                                   | .001                 | 0.38     | 1, 419    | 0.11     | 0.62     | 419       | -0.24 –<br>0.45    | .536     |
| Multivariate                              |                      |          |           |          |          |           |                    |          |
| At home and at university                 | .003                 | 0.53     | 2, 414    |          |          |           |                    | .586     |
| At home                                   |                      |          |           | 0.16     | 1.03     | 414       | -0.14 –<br>0.46    | .304     |
| At university                             |                      |          |           | -0.02    | -0.13    | 414       | -0.27 –<br>0.24    | .897     |
| Multivariate adjusted                     |                      |          |           |          |          |           |                    |          |
| With confounders                          |                      |          |           |          |          |           |                    |          |
| At home                                   |                      |          |           | 0.23     | 1.45     | 593       | -0.08 –<br>0.54    | .147     |
| At university                             |                      |          |           | -0.03    | -0.24    | 593       | -0.30 –<br>0.24    | .809     |
| Gender                                    |                      |          |           | -5.66    | -0.93    | 593       | -17.59 –<br>6.26   | .352     |
| Age                                       |                      |          |           | -0.28    | -0.64    | 593       | -1.13 –<br>0.57    | .519     |
| Income                                    |                      |          |           | 3.52     | 0.56     | 593       | -8.73 –<br>15.77   | .573     |
| Education                                 |                      |          |           | -5.59    | -1.96    | 593       | -11.18 –<br>-0.001 | .050     |

15

| <i>Sedentariness (time spent sitting, hours per day)</i> |                      |          |           |          |          |           |                  |          |
|----------------------------------------------------------|----------------------|----------|-----------|----------|----------|-----------|------------------|----------|
| <b>Analyses</b>                                          | <b>R<sup>2</sup></b> | <b>F</b> | <b>df</b> | <b>b</b> | <b>t</b> | <b>df</b> | <b>95% CI b</b>  | <b>p</b> |
| <b>Univariate</b>                                        |                      |          |           |          |          |           |                  |          |
| At home                                                  | .02                  | 8.81     | 1, 471    | -0.03    | -2.97    | 471       | -0.05 -<br>-0.01 | .003     |
| At university                                            | .01                  | 2.39     | 1, 467    | -0.01    | -1.55    | 467       | -0.03 -<br>0.003 | .123     |
| Overall                                                  | .02                  | 7.72     | 1, 471    | -0.03    | -2.78    | 471       | -0.05 -<br>-0.01 | .006     |
| <b>Multivariate</b>                                      |                      |          |           |          |          |           |                  |          |
| At home and at university                                | .02                  | 4.81     | 2, 466    |          |          |           |                  | .009     |
| At home                                                  |                      |          |           | -0.03    | -2.68    | 466       | -0.44 -<br>-0.01 | .008     |
| At university                                            |                      |          |           | -0.01    | -0.83    | 466       | -0.02 -<br>0.01  | .532     |
| <b>Multivariate adjusted</b>                             |                      |          |           |          |          |           |                  |          |
| <b>With confounders</b>                                  |                      |          |           |          |          |           |                  |          |
| At home                                                  |                      |          |           | -0.04    | -2.59    | 593       | -0.06 -<br>-0.01 | .010     |
| At university                                            |                      |          |           | -0.01    | -0.70    | 593       | -0.03 -<br>0.02  | .487     |
| Gender                                                   |                      |          |           | 0.22     | 0.54     | 593       | -0.57 -<br>1.01  | .587     |
| Age                                                      |                      |          |           | 0.06     | 1.77     | 593       | -0.01 -<br>0.12  | .076     |
| Income                                                   |                      |          |           | -0.60    | -1.31    | 593       | -1.50 -<br>0.30  | .192     |
| Education                                                |                      |          |           | 0.21     | 1.10     | 593       | -0.16 -<br>0.58  | .272     |

16

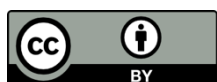

© 2019 by the authors. Submitted for possible open access publication under the terms and conditions of the Creative Commons Attribution (CC BY) license (<http://creativecommons.org/licenses/by/4.0/>).

17
